# Supplementary material for: Genomic features defining exonic variants that modulate splicing
Source: Springer Nature journal article supplement (doi:10.1186/gb-2010-11-2-r20), 2010-02-16
Supplement: Additional file 1 [file gb-2010-11-2-r20-s1.pdf]

**Table S1 – List of 87 Synonymous and Missense variants that cause exon skipping used for analysis in this study.** The variants are located in 40 genes and 47 individual exons. Variant locations are from human genome assembly hg18. References can be found in the main text of the paper.

| SNP No. | Chr | Position  | Gene          | Potential Coding effect | Variant (Protein) | Variant (DNA) | Reference |
|---------|-----|-----------|---------------|-------------------------|-------------------|---------------|-----------|
| 1       | 1   | 196932540 | <b>PTPRC</b>  | Synonymous              | P->P              | C->G          | [55]      |
| 2       | 2   | 211181402 | <b>CPS1</b>   | Synonymous              | S->S              | C->A          | [64]      |
| 3       | 3   | 37017458  | <b>MLH1</b>   | Synonymous              | D->D              | T->C          | [65]      |
| 4       | 3   | 143757998 | <b>ATR</b>    | Synonymous              | E->E              | A->G          | [37]      |
| 5       | 4   | 185806724 | <b>CASP3</b>  | Synonymous (5' UTR)     | -                 | G->A          | [53]      |
| 6       | 5   | 69408148  | <b>SMN1</b>   | Synonymous              | L->L              | A->G          | [43]      |
| 7       | 5   | 70283529  | <b>SMN2</b>   | Synonymous              | F->F              | C->T          | [66]      |
| 8       | 5   | 112198672 | <b>APC</b>    | Synonymous              | R->R              | G->T          | [67]      |
| 9       | 7   | 117017661 | <b>CFTR</b>   | Synonymous              | A->A              | T->A          | [46]      |
| 10      | 7   | 117017667 | <b>CFTR</b>   | Synonymous              | L->L              | G->A          | [46]      |
| 11      | 7   | 117017682 | <b>CFTR</b>   | Synonymous              | S->S              | T->C          | [46]      |
| 12      | 7   | 117017691 | <b>CFTR</b>   | Synonymous              | G->G              | A->G          | [46]      |
| 13      | 7   | 117017691 | <b>CFTR</b>   | Synonymous              | G->G              | A->T          | [46]      |
| 14      | 7   | 117017694 | <b>CFTR</b>   | Synonymous              | Y->Y              | C->T          | [46]      |
| 15      | 10  | 42929995  | <b>RET</b>    | Synonymous              | I->I              | C->T          | [68]      |
| 16      | 10  | 114190345 | <b>ZDHHC6</b> | Synonymous              | T->T              | C->T          | [53]      |
| 17      | 11  | 118464207 | <b>HMBS</b>   | Synonymous              | R->R              | C->G          | [69]      |
| 18      | 14  | 22444702  | <b>RBM23</b>  | Synonymous              | R->R              | G->A          | [53]      |
| 19      | 15  | 46516836  | <b>FBN1</b>   | Synonymous              | I->I              | C->T          | [70]      |
| 20      | 15  | 78251635  | <b>FAH</b>    | Synonymous              | N->N              | C->T          | [71]      |
| 21      | 17  | 26551622  | <b>NF1</b>    | Synonymous              | Q->Q              | G->A          | [72]      |
| 22      | 17  | 26689883  | <b>NF1</b>    | Synonymous              | Y->Y              | C->T          | [73]      |
| 23      | 17  | 59349223  | <b>GH1</b>    | Synonymous              | E->E              | A->G          | [13]      |
| 24      | 19  | 11088602  | <b>LDLR</b>   | Synonymous              | N->N              | C->T          | [54]      |
| 25      | 20  | 44185176  | <b>CD40</b>   | Synonymous              | T->T              | A->T          | [74]      |
| 26      | X   | 19281185  | <b>PDHA</b>   | Synonymous              | Y->Y              | C->T          | [12]      |
| 27      | X   | 19281200  | <b>PDHA</b>   | Synonymous              | I->I              | C->T          | [12]      |
| 28      | X   | 19282574  | <b>PDHA</b>   | Synonymous              | G->G              | A->G          | [75]      |
| 29      | X   | 32276456  | <b>DMD</b>    | Synonymous              | F->F              | C->T          | [76]      |
| 30      | X   | 40341465  | <b>XMRE</b>   | Synonymous              | D->D              | C->T          | [77]      |
| 31      | X   | 53475492  | <b>HADH2</b>  | Synonymous              | R->R              | C->A          | [78]      |
| 32      | X   | 133460368 | <b>HPRT1</b>  | Synonymous              | F->F              | C->T          | [79]      |
| 33      | 1   | 75971876  | <b>ACADM</b>  | Missense                | T->I              | C->T          | [80]      |
| 34      | 2   | 48774922  | <b>LHCGR</b>  | Missense                | E->K              | G->A          | [81]      |
| 35      | 3   | 37017456  | <b>MLH1</b>   | Missense                | N->H              | G->C          | [65]      |
| 36      | 3   | 37017456  | <b>MLH1</b>   | Missense                | N->Y              | G->T          | [65]      |
| 37      | 3   | 37065091  | <b>MLH1</b>   | Missense                | R->P              | G->C          | [82]      |

|    |    |           |               |          |      |      |       |
|----|----|-----------|---------------|----------|------|------|-------|
| 38 | 3  | 37065091  | <b>MLH1</b>   | Missense | R->L | G->T | [82]  |
| 39 | 4  | 104025813 | <b>CISD2</b>  | Missense | E->G | G->C | [83]  |
| 40 | 5  | 69408148  | <b>SMN1</b>   | Missense | L->F | A->C | [43]  |
| 41 | 5  | 69408149  | <b>SMN1</b>   | Missense | N->H | A->C | [43]  |
| 42 | 5  | 69408152  | <b>SMN1</b>   | Missense | X->E | T->G | [43]  |
| 43 | 5  | 69408154  | <b>SMN1</b>   | Missense | X->Y | A->T | [43]  |
| 44 | 5  | 69408154  | <b>SMN1</b>   | Missense | X->Y | A->C | [43]  |
| 45 | 5  | 74052072  | <b>HEXB</b>   | Missense | D->G | A->G | [40]  |
| 46 | 7  | 117017657 | <b>CFTR</b>   | Missense | D->G | A->G | [47]  |
| 47 | 10 | 124802603 | <b>ACADSB</b> | Missense | M->V | A->G | [84]  |
| 48 | 11 | 107692006 | <b>ATM</b>    | Missense | E->K | G->A | [85]  |
| 49 | 13 | 31835504  | <b>BRCA2</b>  | Missense | T->R | C->G | [86]  |
| 50 | 13 | 47851743  | <b>RB1</b>    | Missense | G->R | G->A | [87]  |
| 51 | 15 | 38487132  | <b>IVD</b>    | Missense | R->C | C->T | [88]  |
| 52 | 15 | 38487133  | <b>IVD</b>    | Missense | R->P | G->T | [88]  |
| 53 | 15 | 38487189  | <b>IVD</b>    | Missense | D->N | G->A | [88]  |
| 54 | 16 | 8812504   | <b>PMM2</b>   | Missense | E->K | G->A | [89]  |
| 55 | 17 | 4745668   | <b>CHRNE</b>  | Missense | F->V | T->G | [90]  |
| 56 | 17 | 26521112  | <b>NF1</b>    | Missense | D->V | A->T | [91]  |
| 57 | 17 | 26551623  | <b>NF1</b>    | Missense | L->M | C->A | [72]  |
| 58 | 17 | 38469489  | <b>BRCA1</b>  | Missense | E->K | G->A | [92]  |
| 59 | 17 | 59349200  | <b>GH1</b>    | Missense | K->R | A->G | [93]  |
| 60 | 17 | 59349202  | <b>GH1</b>    | Missense | Q->H | G->T | [93]  |
| 61 | 17 | 59349205  | <b>GH1</b>    | Missense | E->D | A->T | [93]  |
| 62 | 17 | 59349206  | <b>GH1</b>    | Missense | E->V | A->T | [93]  |
| 63 | 17 | 59349223  | <b>GH1</b>    | Missense | E->D | A->C | [13]  |
| 64 | 17 | 59349224  | <b>GH1</b>    | Missense | E->G | A->G | [13]  |
| 65 | 17 | 59349225  | <b>GH1</b>    | Missense | E->Q | G->C | [13]  |
| 66 | 20 | 42685097  | <b>ADA</b>    | Missense | A->T | G->A | [94]  |
| 67 | X  | 19282542  | <b>PDHA1</b>  | Missense | A->T | G->A | [95]  |
| 68 | X  | 19282611  | <b>PDHA1</b>  | Missense | A->T | G->A | [96]  |
| 69 | X  | 32276455  | <b>DMD</b>    | Missense | N->Y | A->T | [76]  |
| 70 | X  | 32276456  | <b>DMD</b>    | Missense | F->L | C->G | [76]  |
| 71 | X  | 32276456  | <b>DMD</b>    | Missense | F->L | C->A | [76]  |
| 72 | X  | 32276457  | <b>DMD</b>    | Missense | F->Y | T->A | [76]  |
| 73 | X  | 32276458  | <b>DMD</b>    | Missense | F->I | T->A | [76]  |
| 74 | X  | 77184841  | <b>ATP7A</b>  | Missense | G->R | G->A | [97]  |
| 75 | X  | 102928267 | <b>PLP1</b>   | Missense | R->W | C->T | [98]  |
| 76 | X  | 102928267 | <b>PLP1</b>   | Missense | R->G | C->G | [98]  |
| 77 | X  | 133435146 | <b>HPRT1</b>  | Missense | G->V | G->T | [99]  |
| 78 | X  | 133436885 | <b>HPRT1</b>  | Missense | R->H | G->A | [99]  |
| 79 | X  | 133455283 | <b>HPRT1</b>  | Missense | A->E | C->A | [99]  |
| 80 | X  | 133460309 | <b>HPRT1</b>  | Missense | G->R | G->A | [100] |
| 81 | X  | 133460310 | <b>HPRT1</b>  | Missense | G->V | G->T | [100] |
| 82 | X  | 133460315 | <b>HPRT1</b>  | Missense | E->K | G->A | [99]  |

|    |   |           |              |          |      |      |       |
|----|---|-----------|--------------|----------|------|------|-------|
| 83 | X | 133460322 | <b>HPRT1</b> | Missense | P->L | C->T | [79]  |
| 84 | X | 133460351 | <b>HPRT1</b> | Missense | D->Y | G->T | [99]  |
| 85 | X | 133460361 | <b>HPRT1</b> | Missense | E->V | A->T | [99]  |
| 86 | X | 133460373 | <b>HPRT1</b> | Missense | D->V | A->T | [101] |
| 87 | X | 153783589 | <b>F8</b>    | Missense | R->W | C->T | [102] |
